# Supplementary material
Source: Elsevier journal article supplement (https://www.sciencedirect.com/science/article/pii/S1166708712001273)
Supplement: mmc1 [file mmc1.pdf]

**EVALUATION DU CARACTERE POSITIONNEL DE L'URGENTURIE :  
L'URGENTURIE AU PASSAGE A L'ORTHOSTATISME REVELE-T-ELLE D'UN  
MECANISME URETRAL ?**

Katelyne Hubeaux<sup>1,2</sup>, Xavier Deffieux<sup>1,4</sup>, Kristell Desseaux<sup>3</sup>, Delphine Verollet<sup>1,2</sup>,  
Mireille Dampousse<sup>2</sup>, Gérard Amarenco<sup>1,2</sup>

<sup>1</sup>Er6 UPMC, Paris, F-75013, France;

<sup>2</sup>AP-HP, Groupe Hospitalier Universitaire Est, Service de Neuro-Urologie et d'Explorations  
Périnéales, Hôpital Tenon, 75020 Paris, France

<sup>3</sup>AP-HP, Hôpital Saint-Louis, Département de Biostatistique et Informatique Médicale,  
Inserm U717, F-75010 Paris, France

<sup>4</sup>AP-HP, Hôpital Antoine Béclère, Service de Gynécologie Obstétrique et Médecine de la  
Reproduction, F-92141, Clamart, France.

**Auteur correspondant**

Katelyne Hubeaux  
Service de Neuro-Urologie et d'Explorations Périnéales  
Hôpital Tenon  
4 Rue de la Chine  
75020 PARIS  
France  
Telephone: + 33 1 56 01 75 00  
Fax: + 33 1 56 01 72 30  
Email: [katelyne.hubeaux@free.fr](mailto:katelyne.hubeaux@free.fr)

## **Résumé :**

Objectif : Etudier le rôle du changement de position dans le déclenchement d'une urgenturie chez les femmes, et spécifiquement lors du passage de la position couchée ou allongée à la position debout. Une comparaison des données cliniques et urodynamiques chez des femmes présentant un syndrome clinique d'hyperactivité vésicale dépendant de la position a été effectuée.

Méthode : 38 femmes sans pathologie neurologique ou urologique connue, se plaignant d'urgenturie, sans cause infectieuse urinaire, ont été incluses de manière prospective.

Dans le but de définir différents groupes de patientes, ces dernières devaient remplir un questionnaire spécifique les interrogeant sur le caractère positionnel de leur urgenturie et/ou incontinence urinaire associée, en fonction de 3 positions différentes.

L'urgenturie au passage à l'orthostatisme (UPO) était définie comme l'existence d'une urgenturie apparaissant au lever (c'est à dire au changement de position de la station assise ou allongée à la position debout). Toutes les patientes avaient une cystomanométrie en position debout, une mesure de la pression de clôture urétrale maximale (PCUM) ainsi qu'un VLPP (Valsalva Leak Point Pressure). Les données urodynamiques étaient comparées entre les différents groupes définis par le questionnaire.

Résultats : L'UPO était associée avec une diminution de la PCUM (57 versus 77 cm d'H<sub>2</sub>O ;  $p = 0.017$ ), mais sans corrélation avec un VLPP positif ou une hyperactivité détrusorienne.

Parmi les femmes avec une UPO, celles présentant une incontinence urinaire associée avaient également une PCUM diminuée (46 versus 73 cm d'H<sub>2</sub>O ;  $p = 0.019$ ) et des tests de provocation d'incontinence urinaire à la toux positifs (73 % vs 13 % ;  $p = 0.019$ ). A l'inverse, l'existence d'une incontinence urinaire en position assise était corrélée avec l'existence d'une hyperactivité du détrusor (46 % versus 0%,  $p = 0.02$ ), mais sans corrélation avec une diminution de la PCUM ou un VLPP positif.

Conclusion : Dans cette étude, l'UPO semblait être en rapport avec une défaillance sphinctérienne urétrale (diminution de la pression de clôture urétrale maximale), ceci nécessitant d'être confirmé ultérieurement par de futures études.

## **Introduction :**

Le syndrome clinique d'hyperactivité vésicale est défini par l'existence d'une urgenterie, avec ou sans incontinence urinaire, avec ou sans pollakiurie diurne ou nycturie [1].

Différents stimuli peuvent également provoquer des urgenteries, entrant alors dans le cadre des urgenteries circonstancielles (syndrome clé-porte, proximité des toilettes, audition d'eau, mains sous l'eau). Le changement de position peut également provoquer ce symptôme d'urgence mictionnelle. En effet, certaines femmes se plaignent d'urgenterie ou d'incontinence urinaire sur urgence en fonction du caractère positionnel, comme la position debout, le passage de la position allongée à la position debout, sans jamais aucune urgenterie en position allongée ou en position assise.

En pratique quotidienne, nous avons appelé cette description clinique l'urgenterie au passage à l'orthostatisme (UPO). Ces urgences lors de la mise en orthostatisme peuvent alors suggérer soit une hyperactivité détrusorienne induite par la mise en position debout, soit encore une défaillance des mécanismes de clôture uréthro-sphinctériens. Mattiasson et Hall [2] suggéraient d'ailleurs un possible désordre neuromusculaire urétral chez des patientes avec incontinence urinaire sur urgenterie, avec une chute de la pression urétrale pendant ou immédiatement après un exercice. Gunnarson et Hall [3] décrivaient quant à eux une diminution de l'activité périnéale musculaire en électromyographie (EMG), mesurée par des électrodes d'EMG de surface, chez des patientes ayant une incontinence urinaire sur urgence, à l'effort ou mixte, comparativement à un groupe de volontaires sains, suggérant alors le rôle des muscles du périnée dans le mécanisme de l'incontinence urinaire sur urgence.

Ainsi, outre les mécanismes physiopathologiques déjà décrits dans la genèse du syndrome clinique d'hyperactivité vésicale (par exemple hyperactivité détrusorienne, troubles de la sensibilité vésicale), une origine sphinctérienne et urétrale pourrait être considérée. Plusieurs études ont mis en évidence qu'un traitement par anticholinergique n'améliore pas toujours le

syndrome clinique d'hyperactivité vésicale [4]. Une méta-analyse a montré que des séances de rééducation périnéale bien conduites améliorent les 2 types de symptômes (incontinence urinaire sur urgence et à l'effort), en agissant sur les muscles périnéaux et le sphincter strié urétral sous vésical [5].

L'hypothèse d'un renforcement du réflexe périnéo-détrusorien lors de ces séances de kinésithérapie périnéale pourrait être avancée dans le mécanisme d'amélioration de l'incontinence sur urgenturie.

Si de nombreux auteurs se sont focalisés sur l'analyse urodynamique en fonction de la position du patient, aucune étude spécifique n'a particulièrement étudié l'UPO chez la femme. Cette étude a été construite dans le but d'analyser le rôle du facteur positionnel dans le développement d'une urgenturie chez la femme, et plus spécifiquement le rôle du changement de position, c'est-à-dire le passage de la position allongée ou assise à la position debout.

Ainsi nous avons comparé des données cliniques et urodynamiques de patientes ayant une urgence mictionnelle en rapport avec un facteur positionnel (passage en position debout, position assise, position debout). Nous avons émis l'hypothèse que l'UPO avec ou sans incontinence était en relation avec une défaillance sphinctérienne et/ou urétrale, analysée grâce à la profilométrie (pression de clôture urétrale maximale) et le VLPP (Valsalva Leak Point Pressure).

### **Matériels et Méthodes :**

38 femmes souffrant d'urgenturie ont été incluses dans cette étude de façon consécutive et prospective de juillet 2008 à mars 2009. Ces 38 patientes étaient prises en charge dans le service universitaire de Neuro-Urologie et Explorations Périnéales à Paris.

Cette étude avait bénéficié de l'accord d'un comité national d'éthique (CCP X Paris Ile de France). Toutes les patientes avaient lu et signé, préalablement à l'inclusion dans l'étude, un

consentement écrit. Les différents bilans urodynamiques conduits dans cette étude suivaient les procédures standards en urodynamique. Aucune patiente n'avait reçu de compensation financière.

Les critères d'inclusion comprenaient des femmes âgées de 18 à 75 ans, se plaignant d'urgenterie, d'incontinence urinaire sur urgence ou d'incontinence urinaire mixte. Les femmes plus âgées avaient été exclues de fait de l'absence de norme formelle concernant la pression de clôture urétrale maximale dans cette population. Une infection urinaire non traitée, une pathologie neurologique ou un examen neurologique anormal étaient des critères d'exclusion. Les patientes souffrant de rétention urinaire, présentant un prolapsus pelvien supérieur ou égal à 2 en accord avec la classification de Badden et Walker, ou avec un antécédent de chirurgie d'incontinence urinaire ou urologique étaient exclues.

Toutes les patientes recevant des traitements comme des antimuscariniques, alpha-bloquants, cholinomimétiques, pouvant avoir une action urologique étaient exclues.

Un auto-questionnaire spécifique de symptômes avait été préalablement développé, permettant de mettre en évidence une urgenterie dépendant d'un facteur positionnel (tableau 1).

## **TABLEAU 1: Auto-questionnaire relatif aux symptômes d'urgenteries à l'orthostatisme**

### **Questionnaire en français**

|                                                                                                                                                                                                                                                                                                                                                                                                                                                                                                                                                                                                                                                                                                                                                                                                                                                                                                                                                                                                                                                                                                                                                                               |
|-------------------------------------------------------------------------------------------------------------------------------------------------------------------------------------------------------------------------------------------------------------------------------------------------------------------------------------------------------------------------------------------------------------------------------------------------------------------------------------------------------------------------------------------------------------------------------------------------------------------------------------------------------------------------------------------------------------------------------------------------------------------------------------------------------------------------------------------------------------------------------------------------------------------------------------------------------------------------------------------------------------------------------------------------------------------------------------------------------------------------------------------------------------------------------|
| <p><b>Avez-vous des urgences mictionnelles, c'est à dire un besoin soudain et urgent d'uriner ?</b></p> <p><input type="checkbox"/> <b>oui</b>                      <input type="checkbox"/> <b>non</b></p>                                                                                                                                                                                                                                                                                                                                                                                                                                                                                                                                                                                                                                                                                                                                                                                                                                                                                                                                                                   |
| <p><b>Si vous souffrez de besoin soudain et urgent d'uriner, pouvez-vous préciser les circonstances qui le déclenchent et s'ils s'accompagnent de fuites :</b></p> <p><b>• rien : même en restant <u>assise sans bouger</u>, je peux éprouver des besoins urgents d'uriner:</b></p> <p><input type="checkbox"/> <b>oui</b>                      <input type="checkbox"/> <b>non</b></p> <p><b>avec fuites : <input type="checkbox"/> <b>oui</b>    <input type="checkbox"/> <b>non</b></b></p> <p><b>• lorsque je reste en <u>position debout</u>, je peux éprouver des besoins urgents d'uriner:</b></p> <p><input type="checkbox"/> <b>oui</b>                      <input type="checkbox"/> <b>non</b></p> <p><b>avec fuites : <input type="checkbox"/> <b>oui</b>    <input type="checkbox"/> <b>non</b></b></p> <p><b>• le fait, lorsque je suis assise ou allongée, de <u>passer en position debout</u>, me déclenche des besoins urgents d'uriner :</b></p> <p><input type="checkbox"/> <b>oui</b>                      <input type="checkbox"/> <b>non</b></p> <p><b>avec fuites : <input type="checkbox"/> <b>oui</b>    <input type="checkbox"/> <b>non</b></b></p> |

Les questions permettaient de préciser les circonstances de déclenchement de l'urgenterie dans différentes positions : assise sans bouger, en position debout, au passage en position debout. La patiente devait répondre par oui ou non, et spécifier si une incontinence urinaire était associée à ces urgences mictionnelles (« avec ou sans incontinence urinaire »).

Les patientes étaient ensuite séparées en différents groupes :

-groupe « urgenturie au passage à l'orthostatisme (UPO) », en rapport avec l'existence d'une urgenturie déclenchée par un passage en position debout ;

-groupe « urgenturie en position assise » en rapport avec l'existence d'une urgenturie en position assise sans bouger ;

-groupe « urgenturie en position debout » en rapport avec l'existence d'une urgenturie en position debout fixe.

Au final, six groupes principaux étaient définis grâce à ce questionnaire :

-patientes avec UPO (groupe UPO) et sans (non UPO group) ;

-patientes avec urgenturie en position assise et sans ;

-patientes avec urgenturie en position debout et sans.

Pour chacun des 6 groupes, l'existence ou l'absence d'une incontinence urinaire sur urgence était détaillée.

Le statut ménopausique, l'âge, l'association avec une incontinence urinaire à l'effort, et les antécédents gynéco-obstétriques étaient colligés pour chaque patiente. Un examen clinique était réalisé, incluant l'analyse et la recherche de prolapsus pelvien, une évaluation de l'hypermobilité urétrale clinique, ainsi qu'un test de provocation de fuites à l'effort en position couchée (vessie remplie à 300 ml en position demi allongée sur le dos).

Les mesures en urodynamique étaient réalisées en accord avec les recommandations de l'International Continence Society (ICS) [6,7]:

-une débimétrie initiale avec mesure du résidu post mictionnel par sondage urinaire;

-une profilométrie, réalisée patiente en position allongée, vessie vide, avec cathéter type Bohler Charrière 8, perfusée à l'eau à 2 ml/mn, en accord avec la méthode de Braun et Whickhman [8]. Trois profils successifs étaient réalisés dans le cadre de la reproductibilité, et la pression de clôture urétrale maximale (PCUM) était calculée à chaque fois. La moyenne des 3 PCUM était réalisée. Une insuffisance sphinctérienne urétrale était définie comme une

PCUM inférieure à 30 cm d'H<sub>2</sub>O. Trois profils urétraux étaient réalisés après 7 efforts de toux, et une diminution de plus de 20 % de la PCUM déterminait une fatigabilité urétrale [9].

-une cystomanométrie réalisée en position debout, avec un remplissage vésical à l'eau, à la vitesse de 50 ml/mn, utilisant un cathéter type Bohler Charrière 8. Dix efforts de toux et dix efforts d'accroupissement dans le but de mimer un passage à l'orthostatisme étaient réalisés à la fin du remplissage vésical. La position debout avait été choisie afin de sensibiliser au mieux l'apparition d'une hyperactivité détrusorienne [10]. L'hyperactivité détrusorienne était définie comme l'existence d'une contraction détrusorienne involontaire pendant la phase de remplissage, spontanée ou provoquée, comme définie par l'ICS [1].

-un VLPP (Valsalva Leak point) était réalisé, patiente en position semi-allongée, vessie remplie à 400 ml à la fin de la cystomanométrie. Le cathéter de remplissage vésical était retiré, et la pression intra abdominale mesurée grâce à la persistance de la sonde intra rectale. L'inspection du méat urétral externe permettait de détecter l'apparition d'une fuite. Le VLPP était défini comme la plus faible pression intra abdominale provoquant une fuite, vessie remplie à 400 ml. Les valeurs seuils permettant l'interprétation du VLPP étaient 30, 60, et 90 cm d'H<sub>2</sub>O (pression abdominale).

- un CLPP (Cough Leak Point Pressure) était réalisé dans les mêmes conditions que le VLPP.

Les données cliniques et urodynamique étaient comparées entre les 6 groupes décrits précédemment, c'est à dire entre le groupe des femmes avec et sans urgenturie à l'orthostatisme, avec et sans urgenturie en position debout, et avec et sans urgenturie en position assise.

Dans un second temps, les 3 groupes de femmes avec urgenturie dans les 3 différentes positions étaient analysés en fonction de l'existence ou non d'une incontinence urinaire dans ces différentes positions.

La variable primaire d'analyse urodynamique était la PCUM, et la 2<sup>nd</sup>e le VLPP. Les résultats urodynamiques étaient analysés en aveugle par un investigateur ne connaissant pas les symptômes cliniques décrits par la patiente.

### **Analyse statistique :**

La comparaison de données quantitatives était réalisée par l'utilisation d'un test de Student, et celle de données qualitatives par l'utilisation d'un test de Chi-2 (Statview 5© Software).

Les résultats étaient considérés comme statistiquement significatifs quant  $p < 0.05$  et étaient présentés sous forme de moyenne et de déviation standard. Le coefficient de Spearman était réalisé pour confirmer l'existence ou non d'une association entre l'âge et la PCUM dans notre population.

### **Résultats :**

La population comportait 38 patientes d'âge moyen 53 ans (+/- 10 ans) incluses de manière prospective dans notre étude. Le nombre d'enfants moyen par femme était de 2.3 (+/- 1.8), et 54 % des patientes étaient en post ménopause. 79 % des femmes se plaignaient d'une incontinence urinaire mixte et 21 % d'un syndrome clinique d'hyperactivité vésicale isolée.

La distribution des symptômes cliniques des patientes, en accord avec leurs réponses à l'auto-questionnaire, est décrite dans le tableau 2. Cependant, ces groupes ne sont pas exclusifs, puisque certaines patientes pouvaient se plaindre d'urgenterie dans différentes position. Le groupe UPO comprenait 23 femmes, dont 15 décrivaient également une incontinence urinaire sur urgence associée. 15 femmes ne décrivaient aucune urgence au passage à l'orthostatisme, définissant ainsi le groupe « non UPO ».

**TABLEAU 2: Description clinique et distribution des symptômes urinaires en fonction du facteur positionnel**

|                                                                    | Oui         | Non      |
|--------------------------------------------------------------------|-------------|----------|
| <b>Urgenturies à l'orthostatisme (UPO)</b>                         | 23/38 (61%) | 15 (39%) |
| - avec incontinence urinaire                                       | 15/23 (65%) |          |
| <b>Urgenturies en position assise</b>                              | 20/38 (53%) | 18 (47%) |
| - avec incontinence urinaire                                       | 11/20 (55%) |          |
| <b>Urgenturies en position debout</b>                              | 30/38 (79%) | 8 (21%)  |
| - avec incontinence urinaire                                       | 23/30 (77%) |          |
| <b>Incontinence urinaire mixte (à l'effort et sur urgenturies)</b> | 30/38 (79%) | 8 (21%)  |

En accord avec les critères urodynamiques définis précédemment, 21 % (8/38) des patientes avaient une hyperactivité du détrusor lors de la cystomanométrie en position debout.

Le VLPP était positif pour 29 % (11/38) des femmes, et une fatigabilité urétrale était retrouvée dans 16 % des cas (6/38).

La PCUM moyenne était de 64 cm d'H2O (+/- 27) et 8% (3/38) avaient une insuffisance sphinctérienne urétrale définie par une PCUM inférieure à 30 cm d'H2O.

Les résultats du bilan urodynamique pour les 3 groupes (selon la définition initiale) sont résumés dans les tableaux 2 à 6.

L'analyse univariée mettait en évidence que les femmes avec des UPO avaient une PCUM plus basse que celles sans UPO ( $p = 0.017$ ) et étaient significativement plus âgées et en post ménopause. Aucune différence statistiquement significative n'existait entre le groupe UPO et le groupe non UPO concernant le VLPP, le CLPP, la fatigabilité urétrale, et l'existence d'une hyperactivité détrusorienne en accord avec les critères prédéfinis (table 3).

**TABLEAU 3: Résultats urodynamiques en fonction de la présence d’UPO et d’incontinence urinaire sur UPO**

| Données urodynamiques              | Femmes avec UPO (N=23) | Sans UPO (N=15) | Femmes avec UPO (N=23)           |                                 |
|------------------------------------|------------------------|-----------------|----------------------------------|---------------------------------|
|                                    |                        |                 | Avec incontinence sur UPO (N=15) | Sans incontinence sur UPO (N=8) |
| PCUM (cmH <sub>2</sub> O)          | 57 (±28) *             | 77 (±19)        | 46 (±27) #                       | 73 (±21)                        |
| IS <30 cmH <sub>2</sub> O          | 3 (13%)                | 0 (0%)          | 3 (20%)                          | 0 (0%)                          |
| Fatigabilité urétrale              | 4 (17%)                | 2 (13%)         | 2 (13%)                          | 2 (25%)                         |
| VLPP positif (cmH <sub>2</sub> O)  | 34 (±24)               | 62 (±43)        | 37 (±23)                         | 22                              |
| VLPP positif <60cmH <sub>2</sub> O | 7/19 (37%)             | 4/11 (36%)      | 6/13 (46%)                       | 1/6 (17%)                       |
| HAD en position debout             | 4 (17%)                | 4 (27%)         | 2 (13%)                          | 2 (25%)                         |

\* p=0.017

# p=0.019

**Abréviations:**

Urgenturies au passage à l’orthostatisme (UPO)

Hyperactivité du Détrusor (HAD)

Valsalva Leak Point Pressure test (VLPP)

Pression de Clôture Urétrale Maximum (PCUM)

Insuffisance sphinctérienne (IS)

Aucune différence statistiquement significative concernant le VLPP n’était retrouvée entre les différents groupes. Dans une volonté de simplification, les résultats sont présentés uniquement pour un VLPP positif, pour des pressions intra abdominales inférieures à 60 cm d’H<sub>2</sub>O.

La PCUM est connue pour diminuer avec l’âge [11] et le status ménopausique. Le coefficient de corrélation de Spearman confirmait ces données (Rho = -0.45 [p = 0.02]) dans notre population.

Dans le groupe UPO, les femmes avec une incontinence urinaire associée avait également PCUM plus basse comparativement à celles sans incontinence (p = 0.019). Il n’y avait pas de

différence statistiquement significative pour l'âge et le status ménopausique entre ces 2 groupes (tableau 3 et 4). L'incontinence urinaire sur UPO était retrouvée le plus souvent chez des femmes présentant une incontinence urinaire mixte (87 %) et était significativement associée avec un test de provocation de fuites à l'effort, en position allongée positif (11/13). Cependant, l'UPO sans incontinence était également fréquemment associée avec une incontinence urinaire à l'effort (63 % des incontinenances urinaires mixtes), mais non associée avec un test de provocation à l'effort en position allongée positif (tableau 4).

**TABLEAU 4: Données démographique et cliniques dans les 2 groupes de patientes, avec et sans UPO, avec et sans incontinence urinaire sur UPO.**

| Données cliniques                                | Femmes avec UPO (N=23) | Non UPO (N=15) | Femmes avec UPO (N=23)           |                                 |
|--------------------------------------------------|------------------------|----------------|----------------------------------|---------------------------------|
|                                                  |                        |                | Avec incontinence sur UPO (N=15) | Sans incontinence sur UPO (N=8) |
| Age                                              | 57 (±9) **             | 47 (±9)        | 57 (±11)                         | 56 (±6)                         |
| Ménopause                                        | 18 (78%) ***           | 3 (20%)        | 11 (73%)                         | 7 (88%)                         |
| Parité                                           | 2.7 (±2)               | 1.8 (±0-8)     | 2.5 (±1-1)                       | 2.9 (±3)                        |
| IUE associée                                     | 18 (78%)               | 12 (80%)       | 13 (87%)                         | 5 (63%)                         |
| Hypermobilité urétrale                           | 20 (87%)               | 11 (73%)       | 14 (93%)                         | 6 (75%)                         |
| Test de provocation de fuites à l'effort positif | 12 (52%)               | 6 (40%)        | 11 (73%) *                       | 1 (13%)                         |

\* p=0.019

\*\* p=0.002

\*\*\* p=0.0013

**Abréviations:**

Urgenturies au passage à l'orthostatisme (UPO)    Incontinence urinaire à l'effort (IUE)

Aucune différence statistiquement significative n'avait été retrouvée dans les différents groupes avec urgenturie en position assise, concernant les données urodynamiques (tableau 5) ou cliniques (âge, statut ménopausique, incontinence urinaire à l'effort, hypermobilité urétrale, test de provocation à l'effort).

**TABLEAU 5: Données urodynamiques pour les femmes avec et sans urgenturies en position assise, avec ou sans incontinence urinaire associée**

| Urodynamic data                            | Femmes avec urgenturies en position assise (N=20) | Sans urgenturies en position assise (N=18) | Femmes avec urgenturies en position assise (N=20) |                                            |
|--------------------------------------------|---------------------------------------------------|--------------------------------------------|---------------------------------------------------|--------------------------------------------|
|                                            |                                                   |                                            | Incontinence urinaire associée (N=11)             | Pas d'incontinence urinaire associée (N=9) |
| <b>PCUM (cmH<sub>2</sub>O)</b>             | 61 (±28)                                          | 68 (±25)                                   | 67 (±28)                                          | 69 (±24)                                   |
| <b>IS : PUCM &lt;30</b>                    | 1 (5%)                                            | 2 (11%)                                    | 1 (9.1%)                                          | 0 (0%)                                     |
| <b>Fatigabilité urétrale</b>               | 3 (15%)                                           | 3 (17%)                                    | 2 (18%)                                           | 4 (44%)                                    |
| <b>VLPP positif &lt;60cmH<sub>2</sub>O</b> | 6/15 (40%)                                        | 5/15 (33%)                                 | 3/6 (50%)                                         | 3/9 (33%)                                  |
| <b>HAD en position debout</b>              | 5 (25.0%)                                         | 3 (17%)                                    | 5 (46%) *                                         | 0 (0%)                                     |

\* p=0.02

**Abréviations:**

Hyperactivité du Détrusor (HAD)

Valsalva Leak Point Pressure test (VLPP)

Pression de clôture urétrale maximale (PCUM) Insuffisance sphinctérienne (IS)

Les patientes ayant une incontinence sur urgenturie en position assise avaient significativement plus de diagnostic d'hyperactivité détrusorienne lors du remplissage cystomanométrique vésical ( $p = 0.02$ , tableau 6).

Il n'y avait aucune différence statistiquement significative clinique ou urodynamique dans le groupe de patientes avec et sans urgenturie en position debout, avec et sans incontinence urinaire sur urgenturie en position debout (tableau 6).

**TABLEAU 6: Données urodynamiques pour les femmes avec et sans urgenturies en position debout, avec ou sans incontinence urinaire associée**

| Données urodynamiques                      | Femmes avec urgenturies en position debout (N=30) | Sans urgenturie en position debout (N=8) | Femmes avec urgenturies en position debout (N=30) |                                            |
|--------------------------------------------|---------------------------------------------------|------------------------------------------|---------------------------------------------------|--------------------------------------------|
|                                            |                                                   |                                          | Incontinence urinaire associée (N=23)             | Pas d'incontinence urinaire associée (N=7) |
| <b>PCUM (cmH<sub>2</sub>O)</b>             | 64 ( $\pm 26$ )                                   | 68 ( $\pm 29$ )                          | 67 ( $\pm 27$ )                                   | 53 ( $\pm 28$ )                            |
| <b>IS : PCUM &lt;30</b>                    | 2 (7%)                                            | 1 (13%)                                  | 1 (4%)                                            | 1 (14%)                                    |
| <b>Fatigabilité urétrale</b>               | 6 (20%)                                           | 0 (0%)                                   | 5 (22%)                                           | 1 (14%)                                    |
| <b>VLPP positif &lt;60cmH<sub>2</sub>O</b> | 9/23 (39%)                                        | 2/7 (29%)                                | 7/17 (41%)                                        | 2/6 (33%)                                  |
| <b>HAD en position debout</b>              | 7 (23%)                                           | 1 (13%)                                  | 6 (26%)                                           | 1 (14%)                                    |

**Abréviations:**

Hyperactivité du Détrusor (HAD)

Valsalva Leak Point Pressure test (VLPP)

Pression de clôture urétrale maximale (PCUM)

Insuffisance sphinctérienne (IS)

## **Discussion :**

Dans cette étude, nous avons analysé différents types d'urgenteries : en position assise, au lever, en position debout. A notre connaissance, cette étude a été la première étude clinique chez la femme évaluant le facteur positionnel de l'urgenterie ou de l'incontinence urinaire sur urgence, et sa corrélation urodynamique.

Dans notre population, le symptôme spécifique d'UPO était fréquent chez les femmes se plaignant de syndrome clinique d'hyperactivité vésical (61 %), et d'après nos résultats, il semble primordial de poser la question du facteur positionnel de l'urgenterie lors de l'interrogatoire. En effet, l'urgenterie pourrait découler de différents mécanismes physiopathologiques dépendant du stimulus initial. L'existence d'une hyperactivité détrusorienne sus-jacente était un des mécanismes physiopathologiques les plus connus et décrits largement dans la littérature, mais souvent non retrouvée en pratique clinique.

Dans notre étude, nous avons mis en évidence que l'existence d'une UPO et l'existence d'une incontinence urinaire sur UPO étaient associées avec une diminution de la PCUM. L'incontinence urinaire sur UPO était également corrélée avec un test de provocation de fuites à l'effort positif. Ces 2 résultats suggèrent donc une possible défaillance des mécanismes de clôture uréthro-sphinctériens impliquée dans le phénomène d'UPO et/ou d'incontinence urinaire sur UPO.

Une des principales limitations de notre étude était le faible nombre de patientes incluses ; cependant nous avons mis en évidence certains liens entre les symptômes étudiés et les données urodynamiques. Le calcul de masse corporelle (IMC) aurait pu être également évalué, étant une donnée importante dans le cadre de l'analyse de la PCUM, mais malheureusement nous n'avons pas réalisé cette analyse dans notre étude.

Ceci pourrait donc être un biais pour nos résultats et devrait être pris en compte pour une étude future. Les patientes se plaignant d'UPO et d'incontinence urinaire sur UPO, avaient une diminution statistiquement significative de la PCUM comparativement aux patientes sans UPO, mais sans différence statistiquement significative concernant l'existence d'une hyperactivité détrusorienne sus jacente. Cependant, il faut noter que les patientes avec une UPO sans incontinence étaient plus âgées, ceci pouvant expliquer la différence dans la mesure des PCUM dans ce groupe. Mais concernant spécifiquement l'incontinence urinaire sur UPO, également associée avec une diminution de la PCUM, aucune différence significative concernant l'âge dans ces groupes de patientes n'avait été retrouvée (tableau 4). Ces résultats suggéreraient alors des mécanismes physiopathologiques d'UPO et de l'incontinence urinaire sur UPO en rapport avec une défaillance des mécanismes de clôture urétraux et sphinctériens, corroborant l'amélioration déjà décrite dans la littérature, des phénomènes d'urgenterie et d'incontinence urinaire sur urgenterie après chirurgie pour incontinence urinaire à l'effort [12-14]. Néanmoins nos résultats pourraient suggérer que seuls certains types d'urgenterie, et particulièrement les phénomènes d'urgenterie secondaires à une défaillance urétrale tels que l'UPO, pourraient être améliorés par ce type de chirurgie.

Nous émettions donc l'hypothèse qu'identifier le type d'urgenterie, dans les contexte d'incontinence urinaire mixte ou d'incontinence urinaire à l'effort avec urgenterie isolée, pourrait aider à mieux comprendre pourquoi certaines patientes avec urgenterie sont améliorées après une chirurgie d'incontinence urinaire à l'effort, alors que d'autres sont aggravées ou non améliorées.

L'incontinence urinaire sur urgenterie en position assise fixe était plus fréquemment associée à l'existence d'une hyperactivité détrusorienne, ce qui n'était pas le cas pour l'incontinence urinaire en position debout ou au passage en position debout. Néanmoins, notre étude

analysait avant tout l'association entre UPO et la PCUM et le VLPP, plus que l'analyse de l'existence d'une hyperactivité du détrusor dans le cadre des urgenturies avec incontinence urinaire en position assise. En effet, ceci est une étude préliminaire, et nos résultats et hypothèses nécessitent d'être confirmés dans des études futures incluant un plus grand nombre de patientes, afin de pouvoir réaliser des analyses statistiques multi-variés.

Dans la littérature, il est retrouvé que la mesure de la PCUM est le reflet pour un tiers de la fonction sphinctérienne striée urétrale des muscles périnéaux, pour un autre tiers de la vascularisation urétrale, et pour le dernier tiers, de la musculature lisse et des tissus conjonctifs et péri-urétraux [15]. Chez la femme vieillissante, il avait été montré, que le volume relatif des muscles striés périnéaux et la vascularisation intra urétrale diminuaient, alors que le volume relatif des tissus conjonctifs augmentait avec l'âge [16,17]. En accord avec la littérature, nos résultats montrent que l'existence d'UPO, mais également la diminution de la PCUM est corrélé avec l'âge. Nous pourrions donc émettre l'hypothèse qu'une faiblesse du sphincter strié urétral et des muscles périnéaux, ainsi qu'une diminution de la vascularisation intra urétrale pourraient être des facteurs clés affectant la pression intra urétrale, expliquant les phénomènes d'UPO dans notre population.

Les patientes avec une incontinence urinaire sur UPO avaient significativement plus de tests de provocation de fuites à l'effort positifs, et une plus faible PCUM. Dans la littérature, un test de provocation de fuites à l'effort positif était corrélé avec un dysfonctionnement intrinsèque du sphincter urétral, une incontinence urinaire plus sévère, et une diminution de la PCUM [18-20]. Ainsi, chez les femmes présentant une incontinence urinaire sur UPO et une incontinence urinaire à l'effort (incontinence mixte), nous pourrions émettre l'hypothèse d'une même dysfonction du sphincter urétral expliquant ces 2 phénomènes. L'incontinence

urinaire sur UPO était plus souvent décrite le matin au lever du lit, ou au lever d'une chaise avec une vessie pleine, et était associée avec un désir d'uriner devenu urgent au moment du lever. Nos résultats montraient que ces phénomènes d'UPO ou d'incontinence urinaire sur UPO sembleraient plus être en rapport avec un dysfonctionnement sphinctérien et/ou urétral qu'avec l'existence d'une hyperactivité détrusorienne sus jacente. De Lancey avait récemment décrit des valeurs aussi faibles de PCUM chez les femmes présentant une incontinence urinaire à l'effort et une incontinence urinaire sur urgenterie, suggérant ainsi, chez les femmes blanches, qu'une défaillance sphinctérienne contribuait au mécanisme d'incontinence dans ces 2 types de symptômes [21]. Nous pensons que ce mécanisme de défaillance urétrale ne serait impliqué que dans certaines formes d'incontinence urinaire sur urgence, à savoir l'incontinence sur UPO par exemple.

Nous avons réalisé la profilométrie en position allongée, car il existait une variabilité plus importante des mesures de la PCUM en position debout, et les résultats étaient donc moins précis [22]. De plus, nous n'avons pas réalisé la profilométrie en position debout du fait de l'extrême difficulté à maintenir les cathéters urétraux dans cette position et à obtenir une mesure valide. La mesure de la pression de clôture urétrale maximale en position allongée, reflétait alors les forces passives agissant sur le sphincter urétral au repos, et notre hypothèse était donc qu'une diminution de ces forces pouvait expliquer l'existence de symptômes au moment du lever, quelles que soient les forces actives appliquées sur le sphincter.

Une hypothèse pourrait être qu'au moment du passage en position debout chez la femme, il existerait une défaillance sphinctérienne ou du col vésical, avec pour conséquence le passage d'urines dans l'urètre postérieur, provoquant ainsi un besoin d'uriner brutal et urgent (avec ou sans incontinence). Il pourrait être intéressant de confirmer cette hypothèse en réalisant des

études en vidéo-urodynamique [23]. Nous émettions l'hypothèse que ce passage d'urines dans l'urètre postérieur pourrait être induit par le changement de position (le lever ou passage à l'orthostatisme), l'augmentation naturelle de la pression abdominale au moment du lever, dépassant à ce moment là la pression de clôture urétrale maximale, faible chez ces femmes. Ainsi, une diminution de la PCUM pourrait faciliter l'arrivée de l'urine dans l'urètre au moment du lever, et provoquer ainsi un phénomène d'UPO ou d'incontinence urinaire sur UPO.

Notre étude n'a retrouvé aucune corrélation entre le VLPP et les symptômes d'UPO; pourtant le VLPP évalue la défaillance sphinctérienne dont l'existence était notre hypothèse dans le mécanisme de l'UPO. Une des explications pourrait être que, lors du VLPP, nous évaluons un mécanisme différent de compétence sphinctérienne, non directement corrélé à la pression de clôture urétrale maximale étant donné l'exploration de 2 mécanismes physiopathologiques différents par ces 2 tests [24]. Une corrélation n'a été retrouvée qu'entre de très faibles valeurs du VLPP et de la pression de clôture urétrale maximale, et aucune corrélation stricte n'a été retrouvée entre ces 2 mesures. En réalité, la définition de l'insuffisance sphinctérienne est en rapport avec ces 2 mesures ; il a été souvent décrit dans la littérature que l'insuffisance sphinctérienne était en rapport avec une diminution de la PCUM, ou en rapport avec un faible VLPP, ou une combinaison des 2 [25,26].

### **Conclusion**

L'analyse du facteur positionnel de l'urgenterie et de l'incontinence urinaire sur urgenterie devrait être recherchée à l'interrogatoire, étant donné les corrélations existant avec les données urodynamiques. Notre étude a retrouvé que l'UPO et plus spécifiquement l'incontinence urinaire sur UPO était associée avec une PCUM plus faible, et non en rapport

avec une hyperactivité détrusorienne sus-jacente. L'incontinence urinaire sur UPO était associée avec une diminution de la PCUM et un test de provocation de fuite à l'effort positif. Ces résultats préliminaires suggèreraient un mécanisme d'origine urétral pouvant être associé avec les symptômes d'UPO, ceci nécessitant d'être confirmé par de futures études.

## **ABREVIATIONS**

Urgenturie au Passage à l'Orthostatisme (UPO)  
Pression de Clôture Urétrale Maximale (PCUM)  
Electromyographie (EMG)  
Valsalva Leak Point Pressure test (VLPP)  
International Continence Society (ICS)  
CLPP (Cough Leak Point Pressure)  
Valsalva Leak Point Pressure (VLPP)

## **REMERCIEMENTS**

Aucun.

## **CONFLIT D'INTERET**

Aucune des auteurs n'a de motivations commerciales directes ou indirectes dans le cadre de la publication de cet article.

## BIBLIOGRAPHIE

1. Abrams, P., et al., *Standardisation Sub-committee of the International Continence Society. The standardisation of terminology of lower urinary tract function: report from the Standardisation Sub-committee of the International Continence Society.* Neurourol Urodyn., 2002;21: 167-78.
2. Mattiasson, A. and P. Teleman, *Abnormal urethral motor function is common in female stress, mixed, and urge incontinence.* Neurourol Urodyn. , 2006;25: 703-8.
3. Gunnarsson, M., et al., *Effects of pelvic floor exercises in middle aged women with a history of naïve urinary incontinence: a population based study.* . Eur Urol. , 2002 ;41: 556-61.
4. Roxburgh, C., J. Cook, and N. Dublin, *Anticholinergic drugs versus other medications for overactive bladder syndrome in adults.* Cochrane Database Syst Rev, 2007: CD003190.
5. Dumoulin, C. and J. Hay-Smith, *Pelvic floor muscle training versus no treatment, or inactive control treatments, for urinary incontinence in women.* Cochrane Database Syst Rev, 2010: CD005654.
6. Lose, G., et al., *Standardisation of urethral pressure measurement: report from the Standardisation Sub-Committee of the International Continence Society.* Neurourol Urodyn, 2002. 21: 258-60.
7. Schafer, W., et al., *International Continence Society. Good urodynamic practices: uroflowmetry, filling cystometry, and pressure-flow studies.* . Neurourology and Urodynamics, 2002. 21: 261-74
8. Brown, M. and J.E. Wickham, *The urethral pressure profile.* Br J Urol, 1969. 41: 211-7.
9. Deffieux, X., et al., *Decrease in urethral pressure following repeated cough efforts: a new concept for pathophysiology of stress urinary incontinence.* Int J Urol, 2007. 14: 1019-24.
10. Al-Hayek, S., M. Belal, and P. Abrams, *Does the patient's position influence the detection of detrusor overactivity?* Neurourol Urodyn, 2008. 27: 279-86.
11. Pfisterer, M.H., et al., *Parameters of bladder function in pre-, peri-, and postmenopausal continent women without detrusor overactivity.* Neurourol Urodyn, 2007. 26: p. 356-61.
12. Osman, T., *Stress incontinence surgery for patients presenting with mixed incontinence and a normal cystometrogram.* BJU Int, 2003. 92: 964-8.
13. Kulseng-Hanssen, S., H. Husby, and H.A. Schiøtz, *The tension free vaginal tape operation for women with mixed incontinence: Do preoperative variables predict the outcome?* Neurourol Urodyn, 2007. 26: 115-21; discussion 122.
14. Hermieu, J.F. and P. Debodinance, *[Guidelines for the surgical treatment of female urinary stress incontinence in women using the suburethral sling].* Prog Urol, 2010 suppl 2: p. S112-31.
15. Rud, T., et al., *Factors maintaining the intraurethral pressure in women.* Invest Urol, 1980. 17: 343-7.
16. Strasser, H., et al., *Age dependent apoptosis and loss of rhabdosphincter cells.* J Urol, 2000. 164: 1781-5.
17. Perucchini, D., et al., *Age effects on urethral striated muscle. I. Changes in number and diameter of striated muscle fibers in the ventral urethra.* Am J Obstet Gynecol, 2002. 186: 351-5.
18. Hsu, T.H., R.R. Rackley, and R.A. Appell, *The supine stress test: a simple method to detect intrinsic urethral sphincter dysfunction.* J Urol, 1999. 162: 460-3.

19. Lobel, R.W. and P.K. Sand, *The empty supine stress test as a predictor of intrinsic urethral sphincter dysfunction*. *Obstet Gynecol*, 1996. 88:128-32.
20. Nager, C.W., et al., *Urodynamics, the supine empty bladder stress test, and incontinence severity*. *Neurourol Urodyn*, 2010. 29: 1306-11.
21. DeLancey, J.O., et al., *Differences in continence system between community-dwelling black and white women with and without urinary incontinence in the EPI study*. *Am J Obstet Gynecol*, 2010. 202: 584 e1-584 e12.
22. Dorflinger, A., et al., *Urethral pressure profile: is it affected by position?* *Neurourol Urodyn*, 2002. 21: 553-7.
23. English, S.F., C.L. Amundsen, and E.J. McGuire, *Bladder neck competency at rest in women with incontinence*. *J Urol*, 1999. 161: 578-80.
24. Martan, A., et al., *Weak VLPP and MUCP correlation and their relationship with objective and subjective measures of severity of urinary incontinence*. *Int Urogynecol J Pelvic Floor Dysfunct*, 2007. 18: 267-71.
25. Fleischmann, N., et al., *Sphincteric urinary incontinence: relationship of vesical leak point pressure, urethral mobility and severity of incontinence*. *J Urol*, 2003. 169: 999-1002.
26. Bump, R.C., et al., *Diagnosing intrinsic sphincteric deficiency: comparing urethral closure pressure, urethral axis, and Valsalva leak point pressures*. *Am J Obstet Gynecol*, 1997. 177: 303-10.
